# Supplementary material for: The RsmA RNA-Binding Proteins in Pseudomonas syringae Exhibit Distinct and Overlapping Roles in Modulating Virulence and Survival Under Different Nutritional Conditions
Source: PubMed Central journal article supplement (PMC7952654; doi:10.3389/fpls.2021.637595), 2021-02-26
Supplement: Data_Sheet_3.pdf [file Data_Sheet_3.pdf]

**Table S4. Fold changes of the type III secretion system (T3SS) and alginate biosynthesis genes in HMM**

| Locus tag                        | Description                                               | $\Delta$ rsmA23/<br>PstDC3000 | $\Delta$ rsmA23/<br>$\Delta$ rsmA3 | $\Delta$ rsmA3/<br>PstDC3000 |
|----------------------------------|-----------------------------------------------------------|-------------------------------|------------------------------------|------------------------------|
|                                  |                                                           |                               |                                    |                              |
| <b>Type III secretion system</b> |                                                           |                               |                                    |                              |
| PSPTO_1404                       | <i>hrpL</i> , RNA polymerase sigma factor HrpL            | -504.9                        | -24.79                             | -20.37                       |
| PSPTO_1379                       | <i>hrpR</i> , type III transcriptional regulator HrpR     | -6.82                         | -2.11                              | -3.24                        |
| PSPTO_1380                       | <i>hrpS</i> , type III transcriptional regulator HrpS     | -7.05                         | -2.22                              | -3.18                        |
| PSPTO_0061                       | <i>hopY1</i> , type III effector HopY1                    | -80.53                        | -10.03                             | -8.03                        |
| PSPTO_0588                       | <i>hopH1</i> , type III effector HopH1                    | -117.78                       | -7.83                              | -15.05                       |
| PSPTO_0589                       | <i>hopC1</i> , type III effector HopC1                    | -75.79                        | -5.28                              | -14.35                       |
| PSPTO_1370                       | <i>hopN1</i> , type III effector HopN1                    | -43.08                        | -4.51                              | -9.56                        |
| PSPTO_1372                       | <i>hopAA1-1</i> , type III effector HopAA1-1              | -62.9                         | -5.83                              | -10.79                       |
| PSPTO_1375                       | <i>hopM1</i> , type III effector HopM1                    | -29.03                        | -2.51                              | -11.54                       |
| PSPTO_1377                       | <i>avrE1</i> , type III effector protein AvrE1            | -16.45                        | -2.79                              | -5.89                        |
| PSPTO_1406                       | <i>hopB1</i> , type III effector HopB1                    | -81.28                        | -6.58                              | -12.36                       |
| PSPTO_2678                       | <i>hopP1</i> , type III helper protein HopP1              | -182.2                        | -10.69                             | -17.04                       |
| PSPTO_3087                       | <i>hopAB2</i> , type III effector HopAB2                  | -58.72                        | -5.41                              | -10.86                       |
| PSPTO_4001                       | <i>avrPto1</i> , type III effector protein AvrPto1        | -84.14                        | -7.38                              | -11.4                        |
| PSPTO_4331                       | <i>hopE1</i> , type III effector HopE1                    | -213.12                       | -9.08                              | -23.46                       |
| PSPTO_4588                       | <i>hopS2</i> , type III effector HopS2                    | -47                           | -6.88                              | -6.83                        |
| PSPTO_4597                       | <i>hopS1</i> , type III effector HopS1                    | -140.87                       | -8.24                              | -17.09                       |
| PSPTO_4776                       | <i>hopI1</i> , type III effector HopI1                    | -75.24                        | -5.8                               | -12.98                       |
| PSPTO_5354                       | <i>hopA1</i> , type III effector HopA1                    | -69.62                        | -5.15                              | -13.53                       |
| PSPTO_0502                       | <i>hopF2</i> , type III effector HopF2                    | -15.08                        | /                                  | -11.61                       |
| PSPTO_0877                       | <i>hopQ1-1</i> , type III effector HopQ1-1                | -5.86                         | /                                  | -4.24                        |
| PSPTO_0901                       | <i>hopAG1</i> , type III effector HopAG1                  | -2.37                         | /                                  | -2.74                        |
| PSPTO_1568                       | <i>hopAF1</i> , type III effector HopAF1                  | -5.79                         | /                                  | -3.33                        |
| PSPTO_4691                       | <i>hopAD1</i> , type III effector HopAD1                  | -15.83                        | /                                  | -10.72                       |
| PSPTO_4718                       | <i>hopAA1-2</i> , type III effector HopAA1-2              | -2.98                         | /                                  | -1.83                        |
| PSPTO_4720                       | <i>hopV1</i> , type III effector HopV1                    | -8.73                         | /                                  | -5.7                         |
| PSPTO_4722                       | <i>hopAO1</i> , type III effector HopAO1                  | -11.73                        | /                                  | -8.71                        |
| PSPTO_4727                       | <i>hopG1</i> , type III effector HopG1                    | -18.6                         | /                                  | -10.18                       |
| PSPTOA0012                       | <i>hopX1</i> , type III effector HopX1                    | -8.45                         | /                                  | -5.99                        |
| PSPTOA0018                       | <i>hopO1-1</i> , type III effector HopO1-1                | -3.14                         | /                                  | -3.04                        |
| PSPTOA0019                       | <i>hopT1-1</i> , type III effector HopT1-1                | -2.73                         | /                                  | -2.45                        |
| PSPTO_1391                       | <i>hrpV</i> , negative regulator of <i>hrp</i> expression | -3.25                         | /                                  | -3.37                        |
| PSPTOA0017                       | <i>shcO1</i> , type III chaperone ShcO1                   | -2.7                          | /                                  | -1.95                        |
| PSPTO_1376                       | <i>shcE</i> , type III chaperone ShcE                     | -4.67                         | /                                  | -4.36                        |
| PSPTO_0503                       | <i>shcF</i> , type III chaperone protein ShcF             | -54.35                        | -3.06                              | -17.77                       |
| PSPTO_1369                       | <i>shcN</i> , type III chaperone protein ShcN             | -38.18                        | -3.67                              | -10.39                       |
| PSPTO_1374                       | <i>shcM</i> , type III chaperone ShcM                     | -142.67                       | -7.78                              | -18.33                       |
| PSPTO_4589                       | <i>shcS2</i> , type III chaperone ShcS2                   | -14.13                        | -2.35                              | -6.02                        |
| PSPTO_4599                       | <i>shcS1</i> , type III chaperone ShcS1                   | -54.99                        | -3.33                              | -16.52                       |

|                              |                                                            |          |        |        |
|------------------------------|------------------------------------------------------------|----------|--------|--------|
| <i>PSPTO_4721</i>            | <i>shcV</i> , type III chaperone ShcV                      | -32.76   | -2.85  | -11.51 |
| <i>PSPTO_5353</i>            | <i>shcA</i> , type III chaperone protein ShcA              | -73.98   | -6.06  | -12.2  |
| <i>PSPTO_1390</i>            | <i>hrpT</i> , type III secretion protein HrpT              | -10.4    | /      | -7.46  |
| <i>PSPTO_1384</i>            | <i>hrcJ</i> , type III secretion protein HrcJ              | -176.38  | -12.42 | -14.2  |
| <i>PSPTO_1400</i>            | <i>hrcN</i> , type III secretion cytoplasmic ATPase        | -192.15  | -12.53 | -15.33 |
| <i>PSPTO_1397</i>            | <i>hrcQa</i> , type III secretion protein HrcQa            | -997.41  | -70.41 | -14.17 |
| <i>PSPTO_1396</i>            | <i>hrcQb</i> , type III secretion protein HrcQb            | -263.65  | -14.84 | -17.76 |
| <i>PSPTO_1395</i>            | <i>hrcR</i> , type III secretion protein HrcR              | -126.58  | -7.75  | -16.34 |
| <i>PSPTO_1394</i>            | <i>hrcS</i> , type III secretion protein HrcS              | -276.6   | -21.81 | -12.68 |
| <i>PSPTO_1393</i>            | <i>hrcT</i> , type III secretion protein HrcT              | -161.66  | -13.21 | -12.24 |
| <i>PSPTO_1392</i>            | <i>hrcU</i> , type III secretion protein HrcU              | -58.37   | -4.89  | -11.94 |
| <i>PSPTO_1402</i>            | <i>hrcV</i> , type III secretion protein HrcV              | -222.59  | -13.68 | -16.27 |
| <i>PSPTO_1383</i>            | <i>hrpB</i> , type III secretion protein HrpB              | -464.83  | -28.76 | -16.16 |
| <i>PSPTO_1385</i>            | <i>hrpD</i> , type III secretion protein HrpD              | -181.24  | -12.29 | -14.75 |
| <i>PSPTO_1386</i>            | <i>hrpE</i> , type III secretion protein HrpE              | -215.99  | -13.02 | -16.59 |
| <i>PSPTO_1387</i>            | <i>hrpF</i> , type III secretion protein HrpF              | -402.02  | -26.78 | -15.01 |
| <i>PSPTO_1388</i>            | <i>hrpG</i> , type III secretion protein HrpG              | -959.23  | -57.35 | -16.73 |
| <i>PSPTO_1403</i>            | <i>hrpJ</i> , type III secretion protein HrpJ              | -204.17  | -12.87 | -15.86 |
| <i>PSPTO_1399</i>            | <i>hrpO</i> , type III secretion protein HrpO              | -239.83  | -16.13 | -14.87 |
| <i>PSPTO_1398</i>            | <i>hrpP</i> , type III secretion protein HrpP              | -384.41  | -24.48 | -15.7  |
| <i>PSPTO_1401</i>            | <i>hrpQ</i> , type III secretion protein HrpQ              | -327     | -19.28 | -16.96 |
| <i>PSPTO_1378</i>            | <i>hrpH</i> , lytic murein transglycosylase                | -142.88  | -11.74 | -12.17 |
| <i>PSPTO_1389</i>            | <i>hrcC</i> , type III secretion protein HrcC              | -226.35  | -15.82 | -14.31 |
| <i>PSPTO_0852</i>            | <i>hopAJI</i> , type III helper protein HopAJI             | -24.47   | -3.26  | -7.51  |
| <i>PSPTO_4101</i>            | <i>hopAKI</i> , type III helper protein HopAKI             | -55.64   | -4.78  | -11.65 |
| <i>PSPTO_1381</i>            | <i>hrpA1</i> , type III helper protein HrpA1               | -1084.47 | -53.6  | -20.23 |
| <i>PSPTO_1405</i>            | <i>hrpK1</i> , type III helper protein HrpK1               | -281.56  | -17.75 | -15.86 |
| <i>PSPTO_1373</i>            | <i>hrpW1</i> , type III helper protein HrpW1               | -248.19  | -18.86 | -13.16 |
| <i>PSPTO_1382</i>            | <i>hrpZ1</i> , type III restriction system<br>endonuclease | -883.37  | -45.44 | -19.44 |
| <b>Alginate biosynthesis</b> |                                                            |          |        |        |
| <i>PSPTO_1235</i>            | <i>algI</i> , alginate biosynthesis protein AlgI           | 20.27    | 2.03   | 10     |
| <i>PSPTO_1236</i>            | <i>algL</i> , alginate lyase AlgL                          | 14.18    | 2.13   | 6.65   |
| <i>PSPTO_1237</i>            | <i>algX</i> , alginate biosynthesis protein AlgX           | 19.92    | 2.07   | 9.62   |
| <i>PSPTO_1238</i>            | <i>algG</i> , alginate biosynthesis protein AlgG           | 22.1     | 2.08   | 10.62  |
| <i>PSPTO_1239</i>            | <i>algE</i> , alginate biosynthesis protein AlgE           | 20.37    | 2.03   | 10.04  |
| <i>PSPTO_1240</i>            | <i>algK</i> , alginate biosynthesis protein AlgK           | 20.41    | 1.91   | 10.69  |
| <i>PSPTO_1241</i>            | <i>alg44</i> , alginate biosynthesis protein Alg44         | 22.14    | 2.11   | 10.47  |
| <i>PSPTO_1232</i>            | <i>algA</i> , alginate biosynthesis protein AlgA           | 27.6     | 2.51   | 11     |
| <i>PSPTO_1233</i>            | <i>algF</i> , alginate biosynthesis protein AlgF           | 24.71    | 3.12   | 7.91   |
| <i>PSPTO_1234</i>            | <i>algJ</i> , alginate biosynthesis protein AlgJ           | 22.26    | 2.13   | 10.47  |
| <i>PSPTO_1242</i>            | <i>alg8</i> , alginate biosynthesis protein Alg8           | 22.67    | 2.04   | 11.12  |
| <i>PSPTO_1243</i>            | <i>algD</i> , GDP-mannose 6-dehydrogenase AlgD             | 26.46    | 3.18   | 8.33   |

Differential expression in  $\Delta rsmA23$  versus *Pst*DC3000,  $\Delta rsmA23$  versus  $\Delta rsmA3$ , and  $\Delta rsmA3$  versus *Pst*DC3000 with fold change (FC) $\geq$ 1.5 or FC $\leq$ -1.5 and p-value <0.05. /: non-differentially expressed genes (DEGs); HMM: *hrp*-inducing minimum medium; *Pst*DC3000: *Pseudomonas syringae* pv. *tomato* DC3000;  $\Delta rsmA3$ : the *rsmA3* mutant;  $\Delta rsmA23$ : the *rsmA2/A3* double mutant.

**Table S5. Fold changes of the syringafactin biosynthesis genes in HMM**

| Locus tag                         | Description                                         | $\Delta rsmA23$     | $\Delta rsmA23$  | $\Delta rsmA3$      |
|-----------------------------------|-----------------------------------------------------|---------------------|------------------|---------------------|
|                                   |                                                     | / <i>Pst</i> DC3000 | / $\Delta rsmA3$ | / <i>Pst</i> DC3000 |
| <b>Syringafactin biosynthesis</b> |                                                     |                     |                  |                     |
| <i>PSPTO_2828</i>                 | <i>syrR</i> , transcriptional regulator SyrR        | 12.93               | -2.38            | 30.74               |
| <i>PSPTO_2829</i>                 | <i>syfA</i> , non-ribosomal peptide synthetase SyfA | 7.9                 | -7.37            | 58.2                |
| <i>PSPTO_2830</i>                 | <i>syfB</i> , non-ribosomal peptide synthetase SyfB | 4.56                | -7.31            | 33.31               |
| <i>PSPTO_2831</i>                 | <i>syfC</i> , syringafactin efflux protein SyfC     | 3.3                 | -5.39            | 17.77               |
| <i>PSPTO_2832</i>                 | <i>syfD</i> , syringafactin efflux protein SyfD     | 2.6                 | -5.36            | 13.97               |

Differential expression in  $\Delta rsmA23$  versus *Pst*DC3000,  $\Delta rsmA23$  versus  $\Delta rsmA3$ , and  $\Delta rsmA3$  versus *Pst*DC3000 with fold change (FC) $\geq$ 1.5 or FC $\leq$ -1.5 and p-value <0.05. HMM: *hrp*-inducing minimum medium; *Pst*DC3000: *Pseudomonas syringae* pv. *tomato* DC3000;  $\Delta rsmA3$ : the *rsmA3* mutant;  $\Delta rsmA23$ : the *rsmA2/A3* double mutant.

**Table S6. Selected genes regulated mainly by RsmA2 in HMM**

| Locus tag                            | Description                                                                           | $\Delta rsmA23$     | $\Delta rsmA23$  | $\Delta rsmA3$      |
|--------------------------------------|---------------------------------------------------------------------------------------|---------------------|------------------|---------------------|
|                                      |                                                                                       | / <i>Pst</i> DC3000 | / $\Delta rsmA3$ | / <i>Pst</i> DC3000 |
| <b>Positively regulated by RsmA2</b> |                                                                                       |                     |                  |                     |
| <b>Sarcosine metabolism</b>          |                                                                                       |                     |                  |                     |
| <i>PSPTO_0457</i>                    | <i>soxG-1</i> , sarcosine oxidase, gamma subunit                                      | -2.9                | -3.91            | /                   |
| <i>PSPTO_0458</i>                    | <i>soxA-1</i> , sarcosine oxidase, alpha subunit                                      | -2.94               | -4.21            | /                   |
| <i>PSPTO_0459</i>                    | <i>soxD-1</i> , sarcosine oxidase subunit delta                                       | -3.52               | -4.21            | /                   |
| <i>PSPTO_0460</i>                    | <i>soxB-1</i> , sarcosine oxidase, beta subunit                                       | -3.13               | -3.86            | /                   |
| <b>Thiamine biosynthesis</b>         |                                                                                       |                     |                  |                     |
| <i>PSPTO_4798</i>                    | <i>thiD</i> , hydroxy-methylpyrimidine kinase                                         | -2.05               | -2.06            | /                   |
| <i>PSPTO_4799</i>                    | <i>thiE</i> , thiamine-phosphate pyrophosphorylase                                    | -2.1                | -2.01            | /                   |
| <b>Negatively regulated by RsmA2</b> |                                                                                       |                     |                  |                     |
| <b>Oxidative stress response</b>     |                                                                                       |                     |                  |                     |
| <i>PSPTO_0066</i>                    | <i>oxyR</i> , oxidative stress regulatory OxyR                                        | 2.2                 | 2.16             | /                   |
| <b>Efflux pump</b>                   |                                                                                       |                     |                  |                     |
| <i>PSPTO_3099</i>                    | <i>mexE</i> , multidrug efflux RND membrane fusion protein MexE                       | 3.21                | 2.95             | /                   |
| <i>PSPTO_3100</i>                    | <i>saxF</i> , aliphatic isothiocyanate resistance protein SaxF; AcrB/AcrD/AcrF family | 3.28                | 3                | /                   |
| <i>PSPTO_3101</i>                    | <i>oprN</i> , outer membrane efflux protein                                           | 3.89                | 3.3              | /                   |

Differential expression in  $\Delta rsmA23$  versus *Pst*DC3000,  $\Delta rsmA23$  versus  $\Delta rsmA3$ , and  $\Delta rsmA3$  versus *Pst*DC3000 with fold change (FC) $\geq$ 1.5 or FC $\leq$ -1.5 and p-value <0.05. /: non-differentially expressed genes (DEGs); HMM: *hrp*-inducing minimum medium; *Pst*DC3000: *Pseudomonas syringae* pv. *tomato* DC3000;  $\Delta rsmA3$ : the *rsmA3* mutant;  $\Delta rsmA23$ : the *rsmA2/A3* double mutant.

**Table S7. Selected genes regulated mainly by RsmA3 in HMM**

| Locus tag                                  | Description                                                           | $\Delta$ rsmA23 | $\Delta$ rsmA23  | $\Delta$ rsmA3 |
|--------------------------------------------|-----------------------------------------------------------------------|-----------------|------------------|----------------|
|                                            |                                                                       | /PstDC3000      | / $\Delta$ rsmA3 | /PstDC3000     |
| <b>Positively regulated by RsmA3</b>       |                                                                       |                 |                  |                |
| <b>Fatty acid biosynthesis/degradation</b> |                                                                       |                 |                  |                |
| PSPTO_5093                                 | acyl carrier protein                                                  | -3.51           | /                | -2.51          |
| PSPTO_4860                                 | <i>accB</i> , acetyl-CoA carboxylase, biotin carboxyl carrier protein | -1.96           | /                | -2.11          |
| PSPTO_3706                                 | acyl-CoA dehydrogenase                                                | 2.74            | /                | 2.95           |
| PSPTO_3857                                 | acyl-CoA dehydrogenase                                                | 5.63            | /                | 4.27           |
| PSPTO_5020                                 | acyl-CoA dehydrogenase family protein                                 | 2.15            | /                | 2.09           |
| PSPTO_0667                                 | short-chain dehydrogenase                                             | 3.54            | /                | 2.97           |
| PSPTO_1056                                 | short chain dehydrogenase                                             | 3.76            | /                | 4.38           |
| PSPTO_1119                                 | short chain dehydrogenase                                             | 3.41            | /                | 2.41           |
| <b>Cellulose biosynthesis</b>              |                                                                       |                 |                  |                |
| PSPTO_1026                                 | <i>wssA</i> , cell morphology protein                                 | -3.27           | /                | -3.05          |
| PSPTO_1027                                 | <i>wssB</i> , cellulose synthase, catalytic subunit                   | -1.79           | /                | -1.96          |
| PSPTO_1029                                 | <i>wssD</i> , endoglucanase                                           | -2.21           | /                | -1.64          |
| <b>Two-component system</b>                |                                                                       |                 |                  |                |
| PSPTO_4373                                 | <i>colS</i> , sensor histidine kinase ColS                            | -1.99           | /                | -1.64          |
| PSPTO_4374                                 | <i>colR</i> , response regulator ColR                                 | -1.91           | /                | -1.86          |
| <b>Negatively regulated by RsmA3</b>       |                                                                       |                 |                  |                |
| <b>Signal transduction</b>                 |                                                                       |                 |                  |                |
| PSPTO_0073                                 | <i>spoT</i> , guanosine-3',5'-bis(diphosphate,3'-pyrophosphohydrolase | -1.38           | /                | -1.75          |
| PSPTO_0856                                 | <i>fpRel</i> , hypothetical protein                                   | 1.93            | /                | 2.3            |
| PSPTO_0969                                 | <i>dksA</i> , dnaK suppressor protein                                 | 2.13            | /                | 2.11           |
| PSPTO_3863                                 | <i>psyR</i> , transcriptional regulator PsyR                          | 3.45            | /                | 2.1            |
| PSPTO_3864                                 | <i>psyI</i> , autoinducer synthesis protein PsyI                      | 1.62            | /                | 1.51           |
| PSPTO_1499                                 | <i>wspR</i> , GGDEF domain-containing protein                         | 2.42            | /                | 2.32           |
| PSPTO_5477                                 | <i>phoB</i> , phosphate regulon protein PhoB                          | 3.02            | /                | 2.43           |
| PSPTO_5478                                 | <i>phoR</i> , phosphate regulon sensor phoR                           | 2.05            | /                | 1.81           |
| PSPTO_5483                                 | <i>phoU</i> , phosphate transport system PhoU                         | 3.17            | /                | 1.99           |
| PSPTO_5484                                 | <i>pstB-2</i> , phosphate transporter ATP-binding protein             | 3.67            | /                | 2.17           |
| <b>Chemotaxis</b>                          |                                                                       |                 |                  |                |
| PSPTO_0908                                 | <i>cheB-1</i> , glutamate methylesterase CheB                         | 13.42           | /                | 17.54          |
| PSPTO_0909                                 | glutamine deamidase CheD                                              | 32.07           | /                | 30.81          |
| PSPTO_0910                                 | <i>cheR-1</i> , chemotaxis protein CheR                               | 123.62          | /                | 97.38          |
| PSPTO_0911                                 | <i>cheW-1</i> , chemotaxis protein CheW                               | 204.42          | /                | 175.37         |
| PSPTO_0912                                 | methyl-accepting chemotaxis protein                                   | 144.44          | /                | 101.24         |
| PSPTO_0913                                 | <i>cheA-1</i> , chemotaxis histidine kinase CheA                      | 132.04          | /                | 107.78         |
| PSPTO_0915                                 | <i>cheY-1</i> , chemotaxis protein CheY                               | 176.81          | /                | 119.59         |
| PSPTO_0916                                 | <i>methyl-accepting chemotaxis protein</i>                            | 77.78           | /                | 54.03          |

|                                          |                                                                 |       |   |       |
|------------------------------------------|-----------------------------------------------------------------|-------|---|-------|
| <i>PSPTO_1008</i>                        | methyl-accepting chemotaxis protein                             | 16.67 | / | 11.48 |
| <i>PSPTO_1493</i>                        | methyl-accepting chemotaxis protein                             | 3.22  | / | 3.15  |
| <i>PSPTO_1494</i>                        | chemotaxis protein CheW                                         | 2.93  | / | 2.9   |
| <i>PSPTO_1495</i>                        | chemotaxis methyltransferase CheR                               | 2.76  | / | 2.94  |
| <i>PSPTO_1496</i>                        | chemotaxis protein CheW                                         | 2.84  | / | 3.25  |
| <i>PSPTO_1928</i>                        | <i>cheR-2</i> , chemotaxis protein methyltransferase CheR       | 2.59  | / | 2.81  |
| <i>PSPTO_2526</i>                        | methyl-accepting chemotaxis protein                             | 2.88  | / | 5.74  |
| <i>PSPTO_4541</i>                        | methyl-accepting chemotaxis protein                             | 2.31  | / | 2.62  |
| <i>PSPTO_4786</i>                        | methyl-accepting chemotaxis protein                             | 2.54  | / | 2.12  |
| <i>PSPTO_5159</i>                        | methyl-accepting chemotaxis protein                             | 3.27  | / | 2.92  |
| <b>Type VI secretion system</b>          |                                                                 |       |   |       |
| <i>PSPTO_3482</i>                        | Rhs element Vgr protein                                         | 2.1   | / | 1.92  |
| <i>PSPTO_4385</i>                        | Rhs element Vgr protein                                         | 2.42  | / | 2.17  |
| <i>PSPTO_5415</i>                        | Rhs element Vgr protein                                         | 1.75  | / | 1.99  |
| <i>PSPTO_5418</i>                        | hypothetical protein PSPTO_5418                                 | 1.79  | / | 2.19  |
| <i>PSPTO_5425</i>                        | clpB protein                                                    | 1.95  | / | 2.36  |
| <i>PSPTO_5435</i>                        | <i>hcp-2</i> , secreted protein Hcp                             | 13.72 | / | 11.47 |
| <i>PSPTO_5436</i>                        | Rhs element Vgr protein                                         | 6.38  | / | 7     |
| <i>PSPTO_5438</i>                        | Rhs family protein                                              | 3.75  | / | 4.11  |
| <b>Capsular polysaccharide</b>           |                                                                 |       |   |       |
| <i>PSPTO_3529</i>                        | <i>pslA</i> , capsular polysaccharide biosynthesis protein PslA | 44.49 | / | 35.66 |
| <i>PSPTO_3530</i>                        | <i>pslB</i> , mannose-6-phosphate isomerase PslB                | 34.38 | / | 29.57 |
| <i>PSPTO_3531</i>                        | <i>pslD</i> , lipoprotein PslD                                  | 49.77 | / | 38.29 |
| <i>PSPTO_3532</i>                        | <i>pslE</i> , exopolysaccharide biosynthesis PslE               | 55.35 | / | 43.74 |
| <i>PSPTO_3533</i>                        | <i>pslF</i> , glycosyl transferase PslF                         | 36.21 | / | 34.33 |
| <i>PSPTO_3534</i>                        | <i>pslG</i> , glycosyl hydrolase, family 5 PslG                 | 20.75 | / | 17.78 |
| <i>PSPTO_3535</i>                        | <i>pslH</i> , glycosyl transferase PslH                         | 25.99 | / | 23.63 |
| <i>PSPTO_3536</i>                        | <i>pslI</i> , glycosyl transferase PslI                         | 31.85 | / | 26.82 |
| <i>PSPTO_3537</i>                        | <i>pslJ</i> , membrane protein PslJ                             | 22.25 | / | 20.75 |
| <i>PSPTO_3539</i>                        | <i>pslK</i> , membrane protein PslK                             | 16.1  | / | 18.14 |
| <b>Osmotic/Oxidative stress response</b> |                                                                 |       |   |       |
| <i>PSPTO_0152</i>                        | <i>osmC</i> , osmotically inducible protein                     | 4.81  | / | 3.77  |
| <i>PSPTO_1338</i>                        | <i>sodC</i> , superoxide dismutase Cu-Zn                        | 7.65  | / | 8.15  |
| <i>PSPTO_4530</i>                        | <i>katG</i> , catalase/oxidase HPI                              | 3.53  | / | 2.62  |
| <i>PSPTO_5263</i>                        | <i>katE</i> , catalase                                          | 18.24 | / | 20.35 |

Differential expression in  $\Delta rsmA23$  versus *Pst*DC3000,  $\Delta rsmA23$  versus  $\Delta rsmA3$ , and  $\Delta rsmA3$  versus *Pst*DC3000 with fold change (FC)  $\geq 1.5$  or FC  $\leq -1.5$  and p-value  $< 0.05$ . /: non-differentially expressed genes (DEGs); HMM: *hrp*-inducing minimum medium; *Pst*DC3000: *Pseudomonas syringae* pv. *tomato* DC3000;  $\Delta rsmA3$ : the *rsmA3* mutant;  $\Delta rsmA23$ : the *rsmA2/A3* double mutant.

**Table S8. Fold changes of the chemotaxis genes in KB**

| Locus tag         | Description                                  | $\Delta rsmA23$    | $\Delta rsmA23$       | $\Delta rsmA3$     |
|-------------------|----------------------------------------------|--------------------|-----------------------|--------------------|
|                   |                                              | / <i>PstDC3000</i> | / <i>\Delta rsmA3</i> | / <i>PstDC3000</i> |
| <b>Chemotaxis</b> |                                              |                    |                       |                    |
| <i>PSPTO_0117</i> | methyl-accepting chemotaxis protein          | -5.45              | -2.65                 | -2.05              |
| <i>PSPTO_2480</i> | methyl-accepting chemotaxis protein          | -4.84              | -2.24                 | -2.16              |
| <i>PSPTO_2511</i> | methyl-accepting chemotaxis protein          | -5.29              | -2.48                 | -2.13              |
| <i>PSPTO_2616</i> | methyl-accepting chemotaxis protein          | -5.2               | -2.78                 | -1.87              |
| <i>PSPTO_3680</i> | methyl-accepting chemotaxis protein          | -5.07              | -2.41                 | -2.11              |
| <i>PSPTO_1323</i> | chemotaxis protein CheV                      | -2.92              | -2.15                 | /                  |
| <i>PSPTO_1334</i> | methyl-accepting chemotaxis protein          | -4.62              | -3.05                 | /                  |
| <i>PSPTO_1495</i> | chemotaxis protein methyltransferase<br>CheR | -2.62              | -1.95                 | /                  |
| <i>PSPTO_1496</i> | chemotaxis protein CheW                      | -2.72              | -2.22                 | /                  |
| <i>PSPTO_2441</i> | methyl-accepting chemotaxis protein          | -2.59              | -3.88                 | /                  |
| <i>PSPTO_2472</i> | methyl-accepting chemotaxis protein          | -2.70              | -2.28                 | /                  |
| <i>PSPTO_2475</i> | methyl-accepting chemotaxis protein          | -1.99              | -2.20                 | /                  |
| <i>PSPTO_2883</i> | methyl-accepting chemotaxis protein          | -3.44              | -2.31                 | /                  |
| <i>PSPTO_3237</i> | methyl-accepting chemotaxis protein          | -3.65              | -2.27                 | /                  |
| <i>PSPTO_3379</i> | methyl-accepting chemotaxis protein          | -1.96              | -1.85                 | /                  |
| <i>PSPTO_3480</i> | methyl-accepting chemotaxis protein          | -2.30              | -2.46                 | /                  |
| <i>PSPTO_3524</i> | chemotaxis protein CheV                      | -3.03              | -2.04                 | /                  |
| <i>PSPTO_3577</i> | methyl-accepting chemotaxis protein          | -2.67              | -2.13                 | /                  |
| <i>PSPTO_3699</i> | methyl-accepting chemotaxis protein          | -3.03              | -2.30                 | /                  |
| <i>PSPTO_0466</i> | methyl-accepting chemotaxis protein          | -4.07              | /                     | -3.41              |
| <i>PSPTO_1927</i> | chemotaxis protein CheV                      | -3.15              | /                     | -1.80              |
| <i>PSPTO_1928</i> | chemotaxis protein methyltransferase<br>CheR | -3.01              | /                     | -1.89              |
| <i>PSPTO_4531</i> | methyl-accepting chemotaxis protein          | -13.83             | /                     | -7.17              |
| <i>PSPTO_5553</i> | methyl-accepting chemotaxis protein          | -5.37              | /                     | -2.70              |

Differential expression in  $\Delta rsmA23$  versus *PstDC3000*,  $\Delta rsmA23$  versus  $\Delta rsmA3$ , and  $\Delta rsmA3$  versus *PstDC3000* with fold change (FC)  $\geq 1.5$  or  $FC \leq -1.5$  and p-value  $< 0.05$ . /: non-differentially expressed genes (DEGs); KB: King's B medium; *PstDC3000*: *Pseudomonas syringae* pv. *tomato* DC3000;  $\Delta rsmA3$ : the *rsmA3* mutant;  $\Delta rsmA23$ : the *rsmA2/A3* double mutant.

**Table S9. Fold changes of the ribosome genes in KB**

| Locus tag                | Description                                | $\Delta rsmA23$    | $\Delta rsmA23$       | $\Delta rsmA3$     |
|--------------------------|--------------------------------------------|--------------------|-----------------------|--------------------|
|                          |                                            | / <i>PstDC3000</i> | / <i>\Delta rsmA3</i> | / <i>PstDC3000</i> |
| <b>Ribosome proteins</b> |                                            |                    |                       |                    |
| <i>PSPTO_0615</i>        | <i>rplK</i> , 50S ribosomal protein L11    | -1.9               | 1.79                  | -3.4               |
| <i>PSPTO_0616</i>        | <i>rplA</i> , 50S ribosomal protein L1     | -1.94              | 1.87                  | -3.62              |
| <i>PSPTO_0617</i>        | <i>rplJ</i> , 50S ribosomal protein L10    | -2.34              | 2.38                  | -5.58              |
| <i>PSPTO_0618</i>        | <i>rplL</i> , 50S ribosomal protein L7/L12 | -2.29              | 2.88                  | -6.58              |
| <i>PSPTO_0627</i>        | <i>rplD</i> , 50S ribosomal protein L4     | -1.77              | 2.15                  | -3.81              |

|                   |                                           |              |             |              |
|-------------------|-------------------------------------------|--------------|-------------|--------------|
| <i>PSPTO_0628</i> | <i>rplW</i> , 50S ribosomal protein L23   | <b>-1.89</b> | <b>2.01</b> | <b>-3.78</b> |
| <i>PSPTO_0644</i> | <i>rpmD</i> , 50S ribosomal protein L30   | <b>-1.81</b> | <b>2.47</b> | <b>-4.46</b> |
| <i>PSPTO_0648</i> | <i>rpsM</i> , 30S ribosomal protein S13   | <b>-1.76</b> | <b>2.33</b> | <b>-4.1</b>  |
| <i>PSPTO_0650</i> | <i>rpsD</i> , 30S ribosomal protein S4    | <b>-1.79</b> | <b>2.29</b> | <b>-4.1</b>  |
| <i>PSPTO_0652</i> | <i>rplQ</i> , 50S ribosomal protein L17   | <b>-1.91</b> | <b>2.69</b> | <b>-5.13</b> |
| <i>PSPTO_0797</i> | <i>rplU</i> , 50S ribosomal protein L21   | <b>-1.85</b> | <b>1.86</b> | <b>-3.43</b> |
| <i>PSPTO_0798</i> | <i>rpmA</i> , 50S ribosomal protein L27   | <b>-1.78</b> | <b>2.01</b> | <b>-3.58</b> |
| <i>PSPTO_0619</i> | <i>rpoB</i> , RNA polymerase subunit beta | /            | <b>3.25</b> | <b>-5.83</b> |
| <i>PSPTO_0621</i> | <i>rpsL</i> , 30S ribosomal protein S12   | /            | <b>1.74</b> | <b>-2.79</b> |
| <i>PSPTO_0622</i> | <i>rpsG</i> , 30S ribosomal protein S7    | /            | <b>1.91</b> | <b>-3.18</b> |
| <i>PSPTO_0625</i> | <i>rpsJ</i> , 30S ribosomal protein S10   | /            | <b>1.83</b> | <b>-3.07</b> |
| <i>PSPTO_0626</i> | <i>rplC</i> , 50S ribosomal protein L3    | /            | <b>1.98</b> | <b>-3.44</b> |
| <i>PSPTO_0629</i> | <i>rplB</i> , 50S ribosomal protein L2    | /            | <b>2.11</b> | <b>-3.34</b> |
| <i>PSPTO_0630</i> | <i>rpsS</i> , 30S ribosomal protein S19   | /            | <b>2.08</b> | <b>-3.63</b> |
| <i>PSPTO_0631</i> | <i>rplV</i> , 50S ribosomal protein L22   | /            | <b>2.14</b> | <b>-3.65</b> |
| <i>PSPTO_0632</i> | <i>rpsC</i> , 30S ribosomal protein S3    | /            | <b>2.43</b> | <b>-3.67</b> |
| <i>PSPTO_0633</i> | <i>rplP</i> , 50S ribosomal protein L16   | /            | <b>2.73</b> | <b>-4.1</b>  |
| <i>PSPTO_0634</i> | <i>rpmC</i> , 50S ribosomal protein L29   | /            | <b>3.13</b> | <b>-4.63</b> |
| <i>PSPTO_0635</i> | <i>rpsQ</i> , 30S ribosomal protein S17   | /            | <b>3.21</b> | <b>-4.94</b> |
| <i>PSPTO_0636</i> | <i>rplN</i> , 50S ribosomal protein L14   | /            | <b>3.23</b> | <b>-5.04</b> |
| <i>PSPTO_0637</i> | <i>rplX</i> , 50S ribosomal protein L24   | /            | <b>3.18</b> | <b>-4.98</b> |
| <i>PSPTO_0638</i> | <i>rplE</i> , 50S ribosomal protein L5    | /            | <b>3.28</b> | <b>-5.92</b> |
| <i>PSPTO_0639</i> | <i>rpsN</i> , 30S ribosomal protein S14   | /            | <b>2.93</b> | <b>-5.13</b> |
| <i>PSPTO_0640</i> | <i>rpsH</i> , 30S ribosomal protein S8    | /            | <b>2.11</b> | <b>-3.52</b> |
| <i>PSPTO_0641</i> | <i>rplF</i> , 50S ribosomal protein L6    | /            | <b>2.32</b> | <b>-3.73</b> |
| <i>PSPTO_0642</i> | <i>rplR</i> , 50S ribosomal protein L18   | /            | <b>2.44</b> | <b>-3.75</b> |
| <i>PSPTO_0643</i> | <i>rpsE</i> , 30S ribosomal protein S5    | /            | <b>2.54</b> | <b>-3.98</b> |
| <i>PSPTO_0645</i> | <i>rplO</i> , 50S ribosomal protein L15   | /            | <b>2.52</b> | <b>-4.34</b> |
| <i>PSPTO_0647</i> | <i>rpmJ</i> , 50S ribosomal protein L36   | /            | <b>2.65</b> | <b>-4.68</b> |
| <i>PSPTO_0649</i> | <i>rpsK</i> , 30S ribosomal protein S11   | /            | <b>2.34</b> | <b>-4.21</b> |
| <i>PSPTO_1473</i> | <i>rpsP</i> , 30S ribosomal protein S16   | /            | <b>1.82</b> | <b>-2.99</b> |
| <i>PSPTO_1476</i> | <i>rplS</i> , 50S ribosomal protein L19   | /            | <b>2.22</b> | <b>-3.76</b> |
| <i>PSPTO_4930</i> | <i>rplI</i> , 50S ribosomal protein L9    | /            | <b>2.64</b> | <b>-4.4</b>  |
| <i>PSPTO_4932</i> | <i>rpsR</i> , 30S ribosomal protein S18   | /            | <b>2.29</b> | <b>-3.98</b> |
| <i>PSPTO_4933</i> | <i>rpsF</i> , 30S ribosomal protein S6    | /            | <b>2.16</b> | <b>-3.75</b> |

Differential expression in  $\Delta rsmA23$  versus *Pst*DC3000,  $\Delta rsmA23$  versus  $\Delta rsmA3$ , and  $\Delta rsmA3$  versus *Pst*DC3000 with fold change (FC) $\geq$ 1.5 or FC $\leq$ -1.5 and p-value <0.05. /: non-differentially expressed genes (DEGs); KB: King's B medium; *Pst*DC3000: *Pseudomonas syringae* pv. *tomato* DC3000;  $\Delta rsmA3$ : the *rsmA3* mutant;  $\Delta rsmA23$ : the *rsmA2/3* double mutant.

**Table S10. Selected genes regulated mainly by RsmA2 in KB**

| Locus tag                            | Description                                                             | $\Delta rsmA23$     | $\Delta rsmA23$  | $\Delta rsmA3$      |
|--------------------------------------|-------------------------------------------------------------------------|---------------------|------------------|---------------------|
|                                      |                                                                         | / <i>Pst</i> DC3000 | / $\Delta rsmA3$ | / <i>Pst</i> DC3000 |
| <b>Positive regulated by RsmA2</b>   |                                                                         |                     |                  |                     |
| <b>Capsular polysaccharide</b>       |                                                                         |                     |                  |                     |
| <i>PSPTO_3529</i>                    | <i>pslA</i> , capsular polysaccharide biosynthesis protein PslA         | -3.03               | -2.27            | /                   |
| <i>PSPTO_3530</i>                    | <i>pslB</i> , mannose-6-phosphate isomerase PslB                        | -2.5                | -2.37            | /                   |
| <i>PSPTO_3531</i>                    | <i>pslD</i> , lipoprotein <i>PslD</i>                                   | -2.54               | -2.94            | /                   |
| <b>Mannitol metabolism</b>           |                                                                         |                     |                  |                     |
| <i>PSPTO_2703</i>                    | <i>uxuB</i> , D-mannonate oxidoreductase                                | -3.76               | -3.84            | /                   |
| <i>PSPTO_2705</i>                    | mannitol ABC transporter permease                                       | -3.94               | -2.47            | /                   |
| <i>PSPTO_2706</i>                    | mannitol ABC transporter permease                                       | -4.73               | -3.02            | /                   |
| <i>PSPTO_2707</i>                    | mannitol ABC transporter                                                | -2.83               | -2.53            | /                   |
| <b>Negatively regulated by RsmA2</b> |                                                                         |                     |                  |                     |
| <b>Alginate biosynthesis</b>         |                                                                         |                     |                  |                     |
| <i>PSPTO_1232</i>                    | <i>algA</i> , alginate biosynthesis protein AlgA                        | 3.11                | 2.38             | /                   |
| <i>PSPTO_1236</i>                    | <i>algL</i> , alginate lyase                                            | 2.83                | 2.3              | /                   |
| <i>PSPTO_1237</i>                    | <i>algX</i> , alginate biosynthesis protein AlgX                        | 2.24                | 3.21             | /                   |
| <i>PSPTO_1238</i>                    | <i>algG</i> , alginate biosynthesis protein AlgG                        | 2.8                 | 5.14             | /                   |
| <i>PSPTO_1239</i>                    | <i>algE</i> , alginate biosynthesis protein AlgE                        | 5.73                | 8.14             | /                   |
| <i>PSPTO_1240</i>                    | <i>algK</i> , alginate biosynthesis protein AlgK                        | 8.21                | 8.08             | /                   |
| <i>PSPTO_1241</i>                    | <i>alg44</i> , alginate biosynthesis protein Alg44                      | 8.14                | 3.98             | /                   |
| <b>Phosphate regulation</b>          |                                                                         |                     |                  |                     |
| <i>PSPTO_5477</i>                    | <i>phoB</i> , phosphate regulon transcriptional regulatory protein PhoB | 6.19                | 6.65             | /                   |
| <i>PSPTO_5478</i>                    | <i>phoR</i> , phosphate regulon sensor protein phoR                     | 4.24                | 5.6              | /                   |
| <i>PSPTO_5486</i>                    | phosphate ABC transporter permease                                      | 4.09                | 5                | /                   |
| <i>PSPTO_5487</i>                    | phosphate ABC transporter substrate-binding protein                     | 9.75                | 7.63             | /                   |

Differential expression in  $\Delta rsmA23$  versus *Pst*DC3000,  $\Delta rsmA23$  versus  $\Delta rsmA3$ , and  $\Delta rsmA3$  versus *Pst*DC3000 with fold change (FC) $\geq$ 1.5 or FC $\leq$ -1.5 and p-value <0.05. /: non-differentially expressed genes (DEGs); KB: King's B medium; *Pst*DC3000: *Pseudomonas syringae* pv. *tomato* DC3000;  $\Delta rsmA3$ : the *rsmA3* mutant;  $\Delta rsmA23$ : the *rsmA2/A3* double mutant.



**Table S11. Selected genes regulated mainly by RsmA3 in KB**

| Locus tag                                   | Gene description                                                       | $\Delta$ rsmA23 | $\Delta$ rsmA23 | $\Delta$ rsmA3 |
|---------------------------------------------|------------------------------------------------------------------------|-----------------|-----------------|----------------|
|                                             |                                                                        | /PstDC3000      | /PstDC3000      | /PstDC3000     |
| <b>Positive regulated by RsmA3</b>          |                                                                        |                 |                 |                |
| <b>Fatty acid Biosynthesis /Degradation</b> |                                                                        |                 |                 |                |
| PSPTO_3832                                  | <i>fabG</i> , 3-ketoacyl-(acyl-carrier-protein) reductase              | -1.94           | /               | -3.42          |
| PSPTO_3833                                  | <i>fabD</i> , malonyl CoA-acyl carrier protein transacylase            | -2.06           | /               | -3.14          |
| PSPTO_5093                                  | acyl carrier protein                                                   | -4.48           | /               | -4.34          |
| PSPTO_5094                                  | acyl carrier protein                                                   | -3.39           | /               | -3.48          |
| PSPTO_3834                                  | fatty acid/phospholipid synthesis protein                              | -2.38           | /               | -2.96          |
| PSPTO_4860                                  | <i>accB</i> , acetyl-CoA carboxylase, biotin carboxyl carrier protein  | -1.74           | /               | -2.26          |
| PSPTO_0500                                  | acyl-CoA dehydrogenase family protein                                  | 2.65            | /               | 1.99           |
| PSPTO_1056                                  | short chain dehydrogenase                                              | 3.85            | /               | 3.77           |
| PSPTO_3706                                  | acyl-CoA dehydrogenase                                                 | 4.23            | /               | 4.80           |
| PSPTO_3857                                  | acyl-CoA dehydrogenase                                                 | 3.93            | /               | 3.10           |
| <b>Cellulose biosynthesis</b>               |                                                                        |                 |                 |                |
| PSPTO_1026                                  | <i>wssA</i> , cell morphology protein                                  | -2.52           | /               | -2.55          |
| PSPTO_1027                                  | <i>wssB</i> , cellulose synthase, catalytic subunit                    | -2.04           | /               | -4.49          |
| PSPTO_1029                                  | <i>wssD</i> , endoglucanase                                            | -2.34           | /               | -4.47          |
| <b>Two-component system</b>                 |                                                                        |                 |                 |                |
| PSPTO_4373                                  | <i>colS</i> , sensor histidine kinase ColS                             | -1.89           | /               | -2.24          |
| PSPTO_4374                                  | <i>colR</i> , DNA-binding response regulator ColR                      | -1.78           | /               | -1.48          |
| <b>Negatively regulated by RsmA3</b>        |                                                                        |                 |                 |                |
| <b>Signal transduction</b>                  |                                                                        |                 |                 |                |
| PSPTO_0073                                  | <i>spoT</i> , guanosine-3',5'-bis(diphosphate),3'-pyrophosphohydrolase | -2.09           | /               | -2.12          |
| PSPTO_0856                                  | <i>fpRel</i> , hypothetical protein                                    | 2.41            | /               | 2.67           |
| PSPTO_3863                                  | <i>psyR</i> , transcriptional regulator PsyR                           | 1.81            | /               | 2.18           |
| PSPTO_3864                                  | <i>psyI</i> , autoinducer synthesis protein PsyI                       | 12.81           | /               | 15.37          |
| <b>Type VI secretion system</b>             |                                                                        |                 |                 |                |
| PSPTO_0373                                  | Rhs family protein                                                     | 3.08            | /               | 3.63           |
| PSPTO_4385                                  | Rhs element Vgr protein                                                | 2.42            | /               | 3.04           |
| PSPTO_5435                                  | <i>hcp-2</i> , secreted protein Hcp                                    | 3.83            | /               | 4.08           |
| PSPTO_5436                                  | Rhs element Vgr protein                                                | 5.38            | /               | 4.1            |
| PSPTO_5438                                  | Rhs family protein                                                     | 2.11            | /               | 1.71           |
| <b>Syringafactin biosynthesis</b>           |                                                                        |                 |                 |                |
| PSPTO_2828                                  | <i>syrR</i> , transcriptional regulator SyrR                           | 5.02            | -1.96           | 9.82           |
| PSPTO_2829                                  | <i>syfA</i> , non-ribosomal peptide synthetase                         | 4.70            | /               | 7.98           |
| <b>Alginate biosynthesis</b>                |                                                                        |                 |                 |                |
| PSPTO_1234                                  | <i>algJ</i> , alginate biosynthesis protein AlgJ                       | 5.13            | /               | 3.83           |

|                                              |                                                  |             |   |             |
|----------------------------------------------|--------------------------------------------------|-------------|---|-------------|
| <i>PSPTO_1235</i>                            | <i>algI</i> , alginate biosynthesis protein AlgI | <b>4.8</b>  | / | <b>3.04</b> |
| <i>PSPTO_1242</i>                            | <i>alg8</i> , alginate biosynthesis protein Alg8 | <b>6.51</b> | / | <b>3.71</b> |
| <b>Capsular polysaccharide</b>               |                                                  |             |   |             |
| <i>PSPTO_3536</i>                            | <i>psII</i> , glycosyl transferase PsII          | <b>3.08</b> | / | <b>2.56</b> |
| <i>PSPTO_3537</i>                            | <i>psIJ</i> , membrane protein PsIJ              | <b>3.29</b> | / | <b>2.64</b> |
| <b>Osmotic and oxidative stress response</b> |                                                  |             |   |             |
| <i>PSPTO_0152</i>                            | <i>osmC</i> , osmotically inducible protein      | <b>1.89</b> | / | <b>2</b>    |
| <i>PSPTO_1338</i>                            | <i>sodC</i> , superoxide dismutase, Cu-Zn        | <b>2.45</b> | / | <b>2.29</b> |
| <i>PSPTO_3582</i>                            | <i>katB</i> , catalase                           | <b>4.31</b> | / | <b>4.38</b> |
| <i>PSPTO_5263</i>                            | <i>katE</i> , catalase                           | <b>8.28</b> | / | <b>8.56</b> |

Differential expression in  $\Delta rsmA23$  versus *Pst*DC3000,  $\Delta rsmA23$  versus  $\Delta rsmA3$ , and  $\Delta rsmA3$  versus *Pst*DC3000 with fold change (FC)  $\geq 1.5$  or  $\text{FC} \leq -1.5$  and p-value  $< 0.05$ . /: non-differentially expressed genes (DEGs); KB: King's B medium; *Pst*DC3000: *Pseudomonas syringae* pv. *tomato* DC3000;  $\Delta rsmA3$ : the *rsmA3* mutant;  $\Delta rsmA23$ : the *rsmA2/A3* double mutant.
